# Supplementary material
Source: PubMed Central journal article supplement (PMC4847734)
Supplement: NIHMS766662-supplement-Supplemental_file_2.pdf [file NIHMS766662-supplement-Supplemental_file_2.pdf]

# A Appendix Tables and Figures: Not For Publication

Table A1: Effect of Plant Operating Status on Ambient Air Pollution: Pollutant Specific Coefficients

|                              | (1)                    | (2)                     | (3)                 | (4)                 | (5)                 | (6)                     | (7)                   | (8)                 |
|------------------------------|------------------------|-------------------------|---------------------|---------------------|---------------------|-------------------------|-----------------------|---------------------|
|                              | Benzene                | Cumene                  | Dichloromethane     | Lead (TSP)          | Methylene Chloride  | Nickel                  | Styrene               | Toluene             |
| Plant Open×Dist              | -9.1502***<br>(2.3810) | -37.4841***<br>(8.5595) | -0.8801<br>(0.7433) | -0.6627<br>(6.0252) | 0.2579<br>(1.3544)  | -10.6628***<br>(0.8827) | -21.0906<br>(14.0195) | -1.9633<br>(4.9933) |
| Plant Open×Dist <sup>2</sup> | 7.5063***<br>(2.2812)  | 28.2352***<br>(7.3815)  | 0.9816<br>(0.8171)  | 2.2785<br>(5.6212)  | 0.2332<br>(1.5556)  | 7.8313***<br>(0.9525)   | 20.9231<br>(13.3794)  | 0.5489<br>(4.2769)  |
| Plant Open×Dist <sup>3</sup> | -2.5056***<br>(0.8857) | -8.7304***<br>(2.7271)  | -0.3856<br>(0.3201) | -1.5783<br>(2.1001) | -0.2477<br>(0.6738) | -2.4739***<br>(0.3816)  | -7.8927<br>(4.8879)   | 0.1807<br>(1.3857)  |
| Plant Open×Dist <sup>4</sup> | 0.2944**<br>(0.1194)   | 0.9455**<br>(0.3630)    | 0.0492<br>(0.0408)  | 0.2873<br>(0.2700)  | 0.0469<br>(0.0951)  | 0.2837***<br>(0.0509)   | 0.9772<br>(0.5901)    | -0.0600<br>(0.1524) |
| Monitor Count                | 49                     | 23                      | 51                  | 32                  | 21                  | 11                      | 51                    | 67                  |
| N                            | 1106                   | 358                     | 1077                | 532                 | 315                 | 324                     | 1000                  | 1970                |

NOTES: This table reports regression coefficients from 8 separate regressions. The unit of observation is the monitor-plant pair and the dependent variable in all regressions is ambient hazardous pollution, standardized so each pollutant has mean 0 and standard deviation is 1. All regressions include monitor-pair fixed effect and an indicator variable for whether each plant is operating 1(Plant Operating). Standard errors are two-way clustered on plant and monitor.

Table A2: The Effect of Toxic Plants on Housing Values: Model Sensitivity to Alternative Controls

|                                           | (1)                  | (2)                  | (3)                  | (4)                  | (5)                  | (6)                     | (7)                | (8)                 | (9)                 |
|-------------------------------------------|----------------------|----------------------|----------------------|----------------------|----------------------|-------------------------|--------------------|---------------------|---------------------|
|                                           | <b>Baseline</b>      |                      |                      |                      |                      | <b>First Difference</b> |                    |                     |                     |
| 1(Plant Operating) $\times$ 1(<0.5 Miles) | -0.027***<br>(0.008) | -0.032***<br>(0.007) | -0.030***<br>(0.007) | -0.025***<br>(0.007) | -0.025***<br>(0.008) | -0.034***<br>(0.008)    | -0.020*<br>(0.010) | -0.020**<br>(0.010) | -0.014**<br>(0.007) |
| N                                         | 34736                | 34736                | 34736                | 34736                | 34736                | 1114248                 | 1114248            | 1114248             | 1114248             |
| Plant $\times$ Distance-Bin FE            | X                    | X                    | X                    | X                    | X                    |                         |                    |                     |                     |
| Census Tract Quadratic Trends             |                      | X                    | X                    | X                    | X                    |                         | X                  | X                   | X                   |
| State $\times$ Year FE                    |                      |                      | X                    |                      |                      |                         |                    | X                   |                     |
| County $\times$ Year FE                   |                      |                      |                      | X                    |                      |                         |                    |                     | X                   |
| Plant $\times$ Year FE                    |                      |                      |                      |                      | X                    |                         |                    |                     |                     |

NOTES: This table reports regression coefficients from 9 separate regressions. The dependent variable in all regressions is housing values (in logs). In columns (1)-(5), the data have been aggregated to plant by distance by year cells, and regressions are weighted by the group-level cell size. In columns (6)-(9), we estimate the model on the set of houses for which we observe 2+ sales in our sample period. Each regression reports estimates of the effect of plant operating status on local housing values, where 1(Plant Operating) is a indicator variable equal to one for plants that have opened and/or have not yet closed. Standard errors two-way clustered by plant and year are in parentheses.

Table A3: The Effect of Toxic Plants on Local Housing Values and Low Birthweight: Using 2-4 Mile Radius Comparison Group

|                                                                        | 0-0.5 Miles          |                      | 0.5-1 Miles         |                      | 0-1 Miles            |                      | 0-1 Miles (+/- 2 years) |                       |
|------------------------------------------------------------------------|----------------------|----------------------|---------------------|----------------------|----------------------|----------------------|-------------------------|-----------------------|
|                                                                        | (1)                  | (2)                  | (3)                 | (4)                  | (5)                  | (6)                  | (7)                     | (8)                   |
| <b>Panel A: Estimated Effect of Plant Operation on Housing Values</b>  |                      |                      |                     |                      |                      |                      |                         |                       |
| 1(Plant Operating) $\times$ 1(< 1 Mile)                                | -0.032***<br>(0.009) | -0.026***<br>(0.008) | -0.013**<br>(0.007) | -0.017***<br>(0.006) | -0.018***<br>(0.007) | -0.019***<br>(0.006) | -0.011*<br>(0.006)      | -0.012***<br>(0.005)  |
| N                                                                      | 34736                | 34736                | 34736               | 34736                | 34736                | 34736                | 30492                   | 30492                 |
| PlantCount                                                             | 2171                 | 2171                 | 2171                | 2171                 | 2171                 | 2171                 | 2171                    | 2171                  |
| <b>Panel B: Estimated Effect of Plant Operation on Low Birthweight</b> |                      |                      |                     |                      |                      |                      |                         |                       |
| 1(Plant Operating) $\times$ 1(< 1 Mile)                                | 0.0001<br>(0.0011)   | -0.0000<br>(0.0011)  | 0.0009*<br>(0.0006) | 0.0011**<br>(0.0005) | 0.0007<br>(0.0006)   | 0.0008<br>(0.0005)   | 0.0017**<br>(0.0008)    | 0.0020***<br>(0.0008) |
| N                                                                      | 88922                | 88922                | 88922               | 88922                | 88922                | 88922                | 63301                   | 62984                 |
| PlantCount                                                             | 3438                 | 3438                 | 3438                | 3438                 | 3438                 | 3438                 | 3438                    | 3438                  |
| Plant $\times$ Distance-Bin FE                                         | X                    | X                    | X                   | X                    | X                    | X                    | X                       | X                     |
| State $\times$ Year FE                                                 | X                    |                      | X                   |                      | X                    |                      | X                       |                       |
| Plant $\times$ Year FE                                                 |                      | X                    |                     | X                    |                      | X                    |                         | X                     |

NOTES: This table reports regression estimates from specifications that are identical to Table 2 (Panel A) and Table 4 (Panel A) except the comparison group is observations between 2 and 4 miles from a plant.

Table A4: The Effect of Toxic Plants on Local Housing Values and Low Birthweight, Distance Radius Specification

|                                                                        | (1)                 | (2)                 | (3)                  | (4)                  | (5)                  | (6)                  | (7)                 | (8)                 | (9)                 | (10)                | (11)                | (12)                |
|------------------------------------------------------------------------|---------------------|---------------------|----------------------|----------------------|----------------------|----------------------|---------------------|---------------------|---------------------|---------------------|---------------------|---------------------|
|                                                                        | 0-0.5               | 0-0.5               | 0.5-1                | 0.5-1                | 1-1.5                | 1-1.5                | 1.5-2               | 1.5-2               | 0-1                 | 0-1                 | 1-2                 | 1-2                 |
| <b>Panel A: Estimated Effect of Plant Operation on Housing Values</b>  |                     |                     |                      |                      |                      |                      |                     |                     |                     |                     |                     |                     |
| 1(Plant Operating)                                                     | -0.018**<br>(0.009) | -0.018**<br>(0.008) | -0.011<br>(0.007)    | -0.013*<br>(0.007)   | -0.002<br>(0.006)    | -0.006<br>(0.007)    | 0.004<br>(0.006)    | -0.000<br>(0.006)   | -0.015**<br>(0.007) | -0.016**<br>(0.007) | 0.000<br>(0.006)    | -0.003<br>(0.006)   |
| N                                                                      | 17336               | 17336               | 17368                | 17368                | 17368                | 17368                | 15976               | 15976               | 17368               | 17368               | 17368               | 17368               |
| PlantCount                                                             | 2167                | 2167                | 2171                 | 2171                 | 2171                 | 2171                 | 1997                | 1997                | 2171                | 2171                | 2171                | 2171                |
| <b>Panel B: Estimated Effect of Plant Operation on Low Birthweight</b> |                     |                     |                      |                      |                      |                      |                     |                     |                     |                     |                     |                     |
| 1(Plant Operating)                                                     | 0.0004<br>(0.0011)  | 0.0003<br>(0.0012)  | 0.0012**<br>(0.0005) | 0.0012**<br>(0.0005) | -0.0012*<br>(0.0007) | -0.0012*<br>(0.0007) | -0.0003<br>(0.0004) | -0.0002<br>(0.0005) | 0.0009<br>(0.0006)  | 0.0009<br>(0.0006)  | -0.0003<br>(0.0003) | -0.0003<br>(0.0003) |
| N                                                                      | 42077               | 42077               | 42140                | 42140                | 42114                | 42114                | 40556               | 40556               | 74890               | 74890               | 75002               | 75002               |
| PlantCount                                                             | 3254                | 3254                | 3256                 | 3256                 | 3256                 | 3256                 | 3136                | 3136                | 5787                | 5787                | 5794                | 5794                |
| Plant×Distance-Bin FE                                                  | X                   | X                   | X                    | X                    | X                    | X                    | X                   | X                   | X                   | X                   | X                   | X                   |
| Year FE                                                                | X                   |                     | X                    |                      | X                    |                      | X                   |                     | X                   |                     | X                   |                     |
| State×Year FE                                                          |                     | X                   |                      | X                    |                      | X                    |                     | X                   |                     | X                   |                     | X                   |

NOTES: This table reports regression estimates from specifications that are identical to Table 2 (Panel A) and Table 4 (Panel A) except that each regression is estimated using only observations from the distance range indicated in the column headings. For example, the regressions described in columns (1) and (2) include only observations from within 0.5 miles of a plant.

Table A5: The Effect of Toxic Plants on Low Birthweight: Model Sensitivity to Alternative Controls

|                                            | (1)                   | (2)                   | (3)                  | (4)                  | (5)                  |
|--------------------------------------------|-----------------------|-----------------------|----------------------|----------------------|----------------------|
| <b>Estimated Effect of Plant Operation</b> |                       |                       |                      |                      |                      |
| 1(Plant Operating) $\times$ 1(< 1 Mile)    | 0.0016***<br>(0.0006) | 0.0016***<br>(0.0006) | 0.0014**<br>(0.0006) | 0.0013**<br>(0.0006) | 0.0014**<br>(0.0007) |
| N                                          | 88958                 | 88958                 | 88958                | 88958                | 88958                |
| PlantCount                                 | 3438                  | 3438                  | 3438                 | 3438                 | 3438                 |
| Plant $\times$ Distance-Bin FE             | X                     | X                     | X                    | X                    | X                    |
| Maternal Characteristics                   |                       | X                     | X                    | X                    | X                    |
| Census Tract Quadratic Trends              |                       |                       | X                    | X                    | X                    |
| State $\times$ Year FE                     |                       |                       |                      | X                    |                      |
| Plant $\times$ Year FE                     |                       |                       |                      |                      | X                    |

NOTES: This table reports regression coefficients from 9 separate regressions aimed at evaluating the sensitivity of the birth outcome estimates to alternative specifications. The dependent variable in all columns is the mean incidence of low birthweight where the data have been aggregated to plant by distance by year cells. Cell level averages have been adjusted for maternal characteristics including age, education, race, and smoking behavior, as well as for month of birth, birth order, and gender of child. See text for details. The mean incidence of low birthweight in our sample is 0.07. The comparison group in all columns is births between 1 and 2 miles from a plant. All columns control for census tract characteristics (interacted with quadratic trends) and regressions are weighted by the group-level cell size. Multiple births are dropped from regressions. Standard errors are two-way clustered by plant and year.

Table A6: The Effect of Toxic Plants on Maternal Characteristics

|                                        | (1)<br>African<br>American | (2)<br>African<br>American | (3)<br>Hispanic          | (4)<br>Hispanic          | (5)<br>Mother's<br>Education | (6)<br>Mother's<br>Education | (7)<br>Teenage<br>Mother | (8)<br>Teenage<br>Mother |
|----------------------------------------|----------------------------|----------------------------|--------------------------|--------------------------|------------------------------|------------------------------|--------------------------|--------------------------|
| 1(Plant Operating) $\times$ 1(<1 Mile) | -0.007***<br>(0.002)       | -0.006***<br>(0.002)       | -0.002<br>(0.002)        | -0.001<br>(0.002)        | 0.008<br>(0.010)             | 0.001<br>(0.009)             | -0.001<br>(0.001)        | -0.000<br>(0.001)        |
| N                                      | 88062                      | 88062                      | 87438                    | 87438                    | 82608                        | 82608                        | 89302                    | 89302                    |
| PlantCount                             | 3438                       | 3438                       | 3438                     | 3438                     | 3438                         | 3438                         | 3438                     | 3438                     |
| Mean                                   | 0.201                      | 0.201                      | 0.219                    | 0.219                    | 12.555                       | 12.555                       | 0.137                    | 0.137                    |
|                                        | (9)<br>Smoker              | (10)<br>Smoker             | (11)<br>White<br>College | (12)<br>White<br>College | (13)<br>Predictive<br>Index  | (14)<br>Predictive<br>Index  | (15)<br>Fertility        | (16)<br>Fertility        |
| 1(Plant Operating) $\times$ 1(<1 Mile) | -0.001<br>(0.001)          | 0.002<br>(0.001)           | 0.002**<br>(0.001)       | 0.001<br>(0.001)         | 0.001***<br>(0.000)          | 0.001***<br>(0.000)          | 0.002<br>(0.005)         | -0.000<br>(0.004)        |
| N                                      | 88077                      | 88077                      | 86093                    | 86093                    | 89388                        | 89388                        | 89388                    | 89388                    |
| PlantCount                             | 3438                       | 3438                       | 3438                     | 3438                     | 3438                         | 3438                         | 3438                     | 3438                     |
| Mean                                   | 0.149                      | 0.149                      | 0.151                    | 0.151                    | 8.084                        | 8.084                        | 4.233                    | 4.233                    |
| Plant $\times$ Distance-Bin FE         | X                          | X                          | X                        | X                        | X                            | X                            | X                        | X                        |
| State $\times$ Year FE                 | X                          |                            | X                        |                          | X                            |                              | X                        |                          |
| Plant $\times$ Year FE                 |                            | X                          |                          | X                        |                              | X                            |                          | X                        |

NOTES: This table reports regression coefficients from 16 separate regressions, 8 per panel. The dependent variable is listed in the column heading, and data have been aggregated to plant by distance by year cells. Cell level averages have been adjusted for maternal characteristics. See text for details. The comparison group in all columns is births between 1 and 2 miles from a plant. The dependent variable "Predictive Index" is created by first running a regression of birthweight on observable characteristics of the mother. The predicted values from this regression are used as a summary index of demographic changes. Fertility is measured as the log number of births in a cell. Regressions are weighted by the group-level cell size (with the exception of "Fertility"). All regressions control for tract characteristics (excluding the dependent variable of interest), interacted with quadratic trends. Multiple births are dropped from regressions. Regressions are weighted by the group-level cell size. Standard errors two-way clustered by plant and year.

Table A7: The Effect of Toxic Plants on Low Birthweight: Alternative Timing Assumptions

|                                                                 | (1)                   | (2)                   | (3)                 | (4)                  |
|-----------------------------------------------------------------|-----------------------|-----------------------|---------------------|----------------------|
|                                                                 | Fractional Assignment |                       | Outer Donut         |                      |
|                                                                 | 0-1 (+/- 2 years)     | 0-1 (+/- 2 years)     | 0-1 (+/- 2 years)   | 0-1 (+/- 2 years)    |
| <b>Panel A: Estimated Effect of Plant Operation</b>             |                       |                       |                     |                      |
| 1(Plant Operating) $\times$ 1(< 1 Mile)                         | 0.0010<br>(0.0007)    | 0.0011*<br>(0.0006)   | 0.0005<br>(0.0007)  | 0.0010<br>(0.0007)   |
| N                                                               | 753329                | 753329                | 695179              | 695179               |
| PlantCount                                                      | 3438                  | 3438                  | 3438                | 3438                 |
| <b>Panel B: Estimated Effect of Plant Openings and Closings</b> |                       |                       |                     |                      |
| 1(Plant Opened) $\times$ 1(< 1 Mile)                            | 0.0017**<br>(0.0009)  | 0.0022***<br>(0.0008) | 0.0018*<br>(0.0010) | 0.0025**<br>(0.0011) |
| 1(Plant Closed) $\times$ 1(< 1 Mile)                            | 0.0000<br>(0.0008)    | -0.0003<br>(0.0008)   | 0.0001<br>(0.0009)  | -0.0003<br>(0.0009)  |
| $H_0$ : Opening=-Closing (p-value)                              | 0.087                 | 0.056                 | 0.103               | 0.097                |
| N                                                               | 753329                | 753329                | 695179              | 695179               |
| Plant Count                                                     | 3438                  | 3438                  | 3438                | 3438                 |
| Plant $\times$ Distance-Bin FE                                  | X                     | X                     | X                   | X                    |
| State $\times$ Year FE                                          | X                     |                       | X                   |                      |
| Plant $\times$ Year FE                                          |                       | X                     |                     | X                    |

NOTES: This table reports regression coefficients from 8 separate regressions, 4 per panel. The dependent variable in all regressions is the mean incidence of low birthweight where the data have been aggregated to plant by distance by month-year cells. Cell level averages have been adjusted for maternal characteristics including age, education, race, and smoking behavior, as well as for month of birth, birth order, and gender of child. Columns (1) and (2) assign plant operating status “fractionally” based on the expected number of months a plant was open during the child’s gestational period  $\in [0, 1]$ . Columns (3) and (4) focus only on births in which there is no ambiguity as to whether the plant was opened or closed (i.e. dropping births just around the plant opening/closing event). In all columns we focus on the sample +/- 2 years from the plant opening event. Panel A estimates the effect of plant operating status on local birth outcomes, where 1(Plant Operating) is a indicator variable equal to one for plants that have opened and/or have not yet closed. Panel B estimates the asymmetric effect of plant openings/closings. Panel B reports p-values from tests that the two coefficients are equal in magnitude but of opposite sign. All columns control for census tract characteristics (interacted with quadratic trends) and regressions are weighted by the group-level cell size. Multiple births are dropped from regressions. Standard errors are two-way clustered by plant and year.



Table A8: The Effect of Toxic Plants on Birthweight, Additional Evidence

|                                                                 | (1)                 | (2)                           | (3)                           | (4)                           | (5)                           | (6)                           | (7)                           | (8)                           | (9)                           |
|-----------------------------------------------------------------|---------------------|-------------------------------|-------------------------------|-------------------------------|-------------------------------|-------------------------------|-------------------------------|-------------------------------|-------------------------------|
|                                                                 | $bw \leq 1000$      | $bw > 1000$<br>$bw \leq 1500$ | $bw > 1500$<br>$bw \leq 2000$ | $bw > 2000$<br>$bw \leq 2500$ | $bw > 2500$<br>$bw \leq 3000$ | $bw > 3000$<br>$bw \leq 3500$ | $bw > 3500$<br>$bw \leq 4000$ | $bw > 4000$<br>$bw \leq 4500$ | $bw > 4500$<br>$bw \leq 5000$ |
| <b>Panel A: Estimated Effect of Plant Operation</b>             |                     |                               |                               |                               |                               |                               |                               |                               |                               |
| 1(Plant Operating) $\times$ 1(< 1 Mile)                         | -0.0003<br>(0.0002) | 0.0005**<br>(0.0002)          | 0.0005**<br>(0.0002)          | 0.0007<br>(0.0006)            | -0.0019<br>(0.0011)           | -0.0003<br>(0.0011)           | 0.0017<br>(0.0013)            | -0.0008<br>(0.0006)           | -0.0001<br>(0.0004)           |
| Mean                                                            | 0.005               | 0.006                         | 0.013                         | 0.047                         | 0.181                         | 0.374                         | 0.277                         | 0.082                         | 0.015                         |
| <b>Panel B: Estimated Effect of Plant Openings and Closings</b> |                     |                               |                               |                               |                               |                               |                               |                               |                               |
| 1(Plant Opening) $\times$ 1(< 1 Mile)                           | -0.0001<br>(0.0004) | 0.0003<br>(0.0003)            | 0.0011***<br>(0.0004)         | 0.0013<br>(0.0008)            | -0.0006<br>(0.0025)           | 0.0007<br>(0.0023)            | 0.0001<br>(0.0026)            | -0.0016<br>(0.0011)           | -0.0011**<br>(0.0005)         |
| 1(Plant Closing) $\times$ 1(< 1 Mile)                           | 0.0004<br>(0.0003)  | -0.0006**<br>(0.0003)         | -0.0001<br>(0.0003)           | -0.0004<br>(0.0007)           | 0.0025*<br>(0.0013)           | 0.0008<br>(0.0011)            | -0.0026*<br>(0.0014)          | 0.0004<br>(0.0005)            | -0.0004<br>(0.0005)           |
| $H_0$ : Opening=-Closing (p-value)                              | 0.616               | 0.463                         | 0.080                         | 0.310                         | 0.510                         | 0.555                         | 0.398                         | 0.280                         | 0.004                         |
| Mean                                                            | 0.005               | 0.006                         | 0.013                         | 0.047                         | 0.181                         | 0.374                         | 0.277                         | 0.082                         | 0.015                         |

NOTES: This table reports regression coefficients from 18 separate regressions, 9 per panel, on a regression of 88958 plant-distance-year cells and 3438 plants. The dependent variable in each regression is an indicator variable for whether a birth falls in a particular birthweight range as indicated by column headings, and the data have been aggregated to plant by distance by year cells. The regression sample changes as one moves across the columns, indicated by the column headings. For example, the specification in column (1) examines the relative likelihood of a birth being below 1000 grams within 1 mile of a plant responds to plant operating status, relative to the comparison group. The comparison group in all columns is births between 1 and 2 miles from a plant. Panel A estimates the effect of plant operating status on local birth outcomes, where 1(Plant Operating) is a indicator variable equal to one for plants that have opened and/or have not yet closed. Panel B estimates the asymmetric effect of plant openings/closings. Panel B reports p-values from tests that the two coefficients are equal in magnitude but of opposite sign. All columns control for plant $\times$ distance-bin and plant $\times$ year fixed effects, census tract characteristics (interacted with quadratic trends), and regressions are weighted by the group-level cell size. Multiple births are dropped from regressions. Standard errors are two-way clustered by plant and year.
